# Supplementary material
Source: publisher site journal article supplement (https://www.dovepress.com/article/444853)
Supplement: Supplementary file 1 [file get_supplementary_file.php]

Supplementary Table 1：The Details of Six Patients with MOG-IgG-Associated Seizures In Clinical Symptom.

| **Characteristic** | **Case 1** | **Case 2** | **Case 3** | **Case 4** | **Case 5** | **Case 6** |
| --- | --- | --- | --- | --- | --- | --- |
| Age, years | 40 | 30 | 34 | 29 | 33 | 30 |
| Sex | M | F | M | M | M | M |
| Disease duration at presentation, days | 1 | 40 | 30 | 11 | 0 | 21 |
| Headache | + | + | + | + | - | + |
| Fever, (the highest temperature) | - | - | + (37.8 ℃) | - | + (38.6℃) | + (38.9 ℃) |
| Preceding infection | + | + | - | + | + | + |
| Upper respiratory infection | + | - | - | - | + | + |
| Gastrointestinal infection | - | + | - | + | + | - |
| Form of onset | Acute | Subacute | Subacute | Subacute | Acute | Subacute |
| Seizure Symptom |  |  |  |  |  |  |
| Status seizure | + | - | - | - | - | - |
| Motor symptom | + | + | + | + | + | + |
| Impaired awareness | + | + | + | - | + | + |
| Seizure Type |  |  |  |  |  |  |
| Focal to bilateral tonic-clonic seizure | + | + | + |  | + | + |
| Focal seizure |  |  |  | + |  |  |
| Head trauma history | + (6 months) | - | + (16 years) | - | + (13 days) | - |
| Brain MRI |  |  |  |  |  |  |
| FLAIR hyperintensity | left partial lobe and temporal lobe cortex, left temporal lobe; brain stem (medulla oblongata, left pons, left crus cerebri), left basal ganglia | left cerebral hemisphere cortex | brain stem (medulla oblongata) | brain stem (left pontine brachium), both sides of frontal lobe and parietal lobe cortex | both sides of frontal lobe and parietal lobe cortex | both sides of parietal lobe cortex, left frontal lobe cortex; right parietal lobe cortex, left cerebellum, |
| EEG | normal | slowing waves on the right centro-parietal regions | slowing waves on the left frontal-parietal regions | slowing waves on the frontal-parietal regions | slowing waves on the frontal-parietal regions | high amplitude diffuse slowing waves on the frontal-parietal regions |
| Anti-MOG antibody positive (CSF), (titer) | - | + (1:32) | + (1:1) | + (1:10) | - | - |
| Anti-MOG antibody positive (Serum), (titer) | + (1:4) | + (1:10) | + (1:10) | - | + (1:100) | + (1:1) |
| CSF leukocytes, *106/L | 180; 8 | 50 | 224 | 36 | 30 | 10; 116 |
| CSF protein, g/l | 0.87; 1.25 | 0.41 | 0.58 | 0.42 | 0.42 | 0.34; 0.63 |
| CSF pressure, mmH20 | 231; 170 | 333 | 265 | 245 | 129 | 265; 299 |
| Treatment |  |  |  |  |  |  |
| Methylprednisolone | 500mg; 1000mg | 1000mg | 500mg | 1000mg | 500mg | -; 120mg |
| Immunoglobulin | + | - | - | - | - | - |
| Anti-seizure medicines (ASMs) | Levetiracetam  0.5g BID | Levetiracetam 0.5g BID | Levetiracetam 0.25g BID | Levetiracetam 0.5g QD +  Sodium Valproate 0.5g QD | Levetiracetam 0.5g BID+  Sodium Valproate 0.5g BID | Levetiracetam 0.5g BID |
| Follow-up |  |  |  |  |  |  |
| Follow-up time, months | 62 | 39 | 55 | 36 | 6 | 12 |
| Seizure free | + | + | + | + | + | + |
| Relapsing (follow-up time, months) | + (2) | - | - | - | - | + (4) |
| Sequelae with neurological symptoms | + | - | - | - | - | - |
| Anti-MOG antibody turned negative (days) | / | + (272d) | + (380d) | + (155d) | - | / |
| Brain MRI turned normal (days) | - | + (156d) | + (355d) | + (599d) | - decreased (30d) | - |

FLAIR: fuid attenuated inversion recovery. EEG: electroencephalogram. CSF: cerebrospinal fluid.

Supplementary Figure 1: Clinical courses, CSF examination and treatment in each MOG-E patient.

X axis represented the disease duration. There are three aspects in the Y axis; first, the height represents the severity of the symptom; second, the dose of the medicine; third, the CSF pressure.


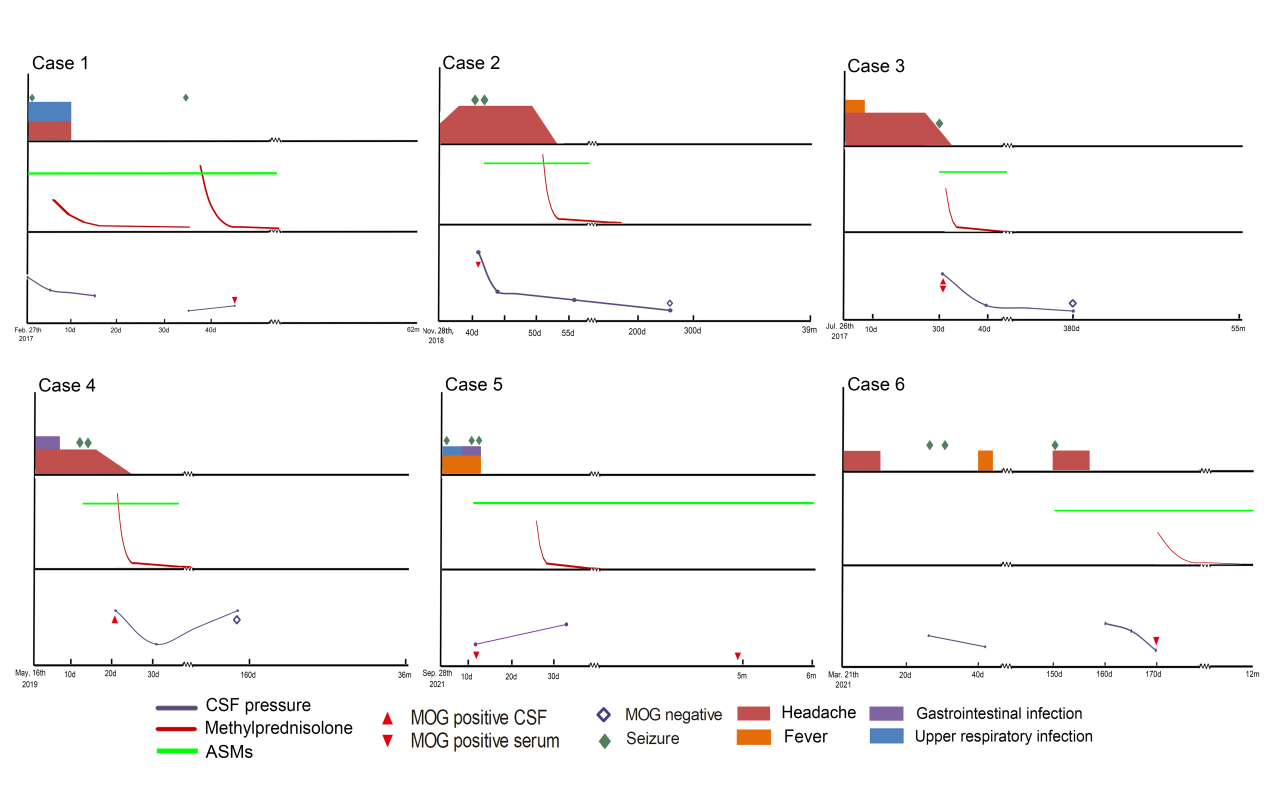


Supplementary Figure 2: Brain MRI findings in case 3.

On admission, fluid-attenuated inversion recovery (FLAIR) hyperintensity was seen in the medulla oblongata in cases 3 (A; July 26th, 2017) and without significant gadolinium enhanced (B). However, the FLAIR hyperintensities in the medulla oblongata reduced after 89d (C; November 23th, 2017) and disappeared after 355d (D; July 15th, 2018).


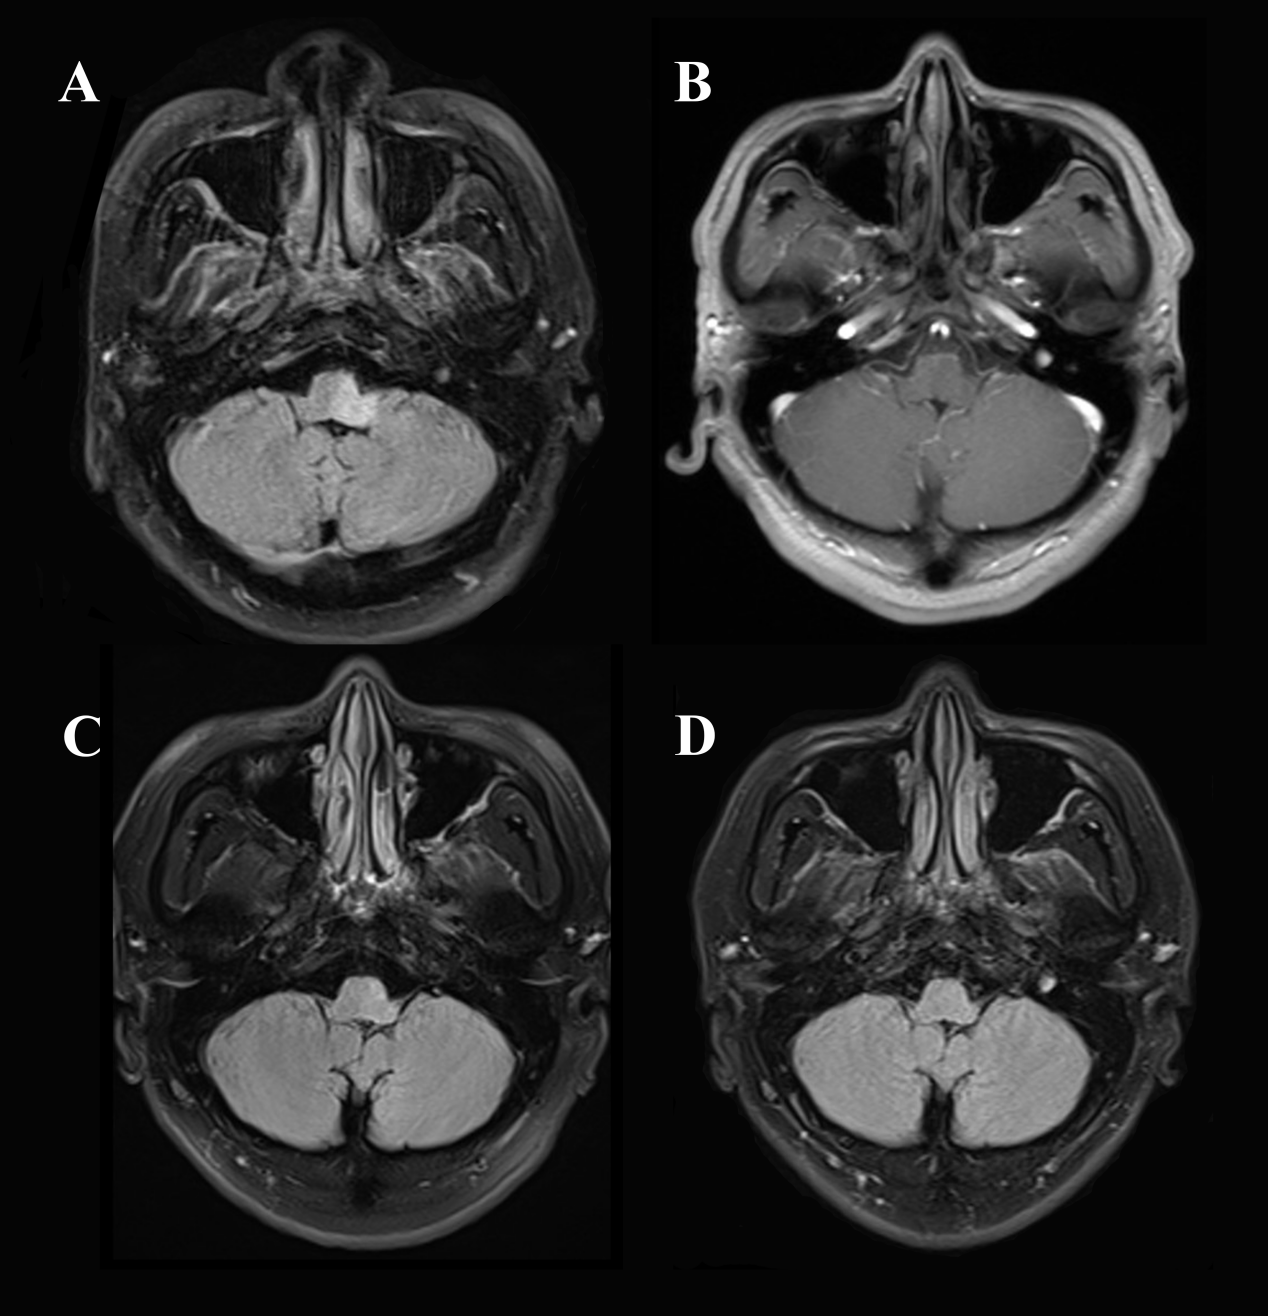


**Supplementary Case Description (Case 3)：**

A 34-year-old man presented with new-onset epileptic seizures that were preceded by 1 month of headaches and fever (highest temperature: 37.8 °C). The patient had a right hemibody motor seizure without any aura, followed by a secondary generalized tonic-clonic seizure. In the following 2 days, he experienced three stereotyped cluster seizures. The patient was confused during the interictal phase. His neurological examination results were mostly normal. Additionally, the patient had an accident 16 years earlier and experienced transient cognitive dysfunction. A CSF examination revealed high pressure (265 mm H2O), leukocyte levels (224 × 106/L), and protein levels (0.58 g/L). The presence of CSF anti-MOG antibody was positive (titer 1:1), serum anti-MOG antibody was positive (titer 1:10), and other autoimmune antibodies, such as AQP4 antibody, LGI1 antibody, GABA antibody, and OB, was negative. The screening of the CSF by RT-PCR for the presence of viruses and NGS was also negative. Visual acuity, critical flicker frequency, fundus examination, and visual evoked potentials were normal. Brain MRI showed that the brainstem (medulla oblongata) was hyperintense in T2-weighted fluid-attenuated inversion recovery without enhancement and the left brain cortex was swollen; the spinal cord MRI scan was normal (supplementary figure 2). EEG showed slowing waves in the left frontoparietal regions. The patient was treated with intravenous methylprednisolone (1,000 mg/day) and levetiracetam (0.25 g twice a day). After 10 days of immunotherapy, the CSF pressure, leukocyte levels, and protein levels decreased. After being seizure-free for 6 months and having a normalized EEG, he was weaned off AEDs. Repeat brain MRI revealed that the abnormal hyperintense signals had almost disappeared, and the presence of MOG-IgG antibodies in the serum and CSF was negative at the 12-month follow-up. Follow-up continued for 55 months following the seizure, and there was no further relapse or obvious sequelae.
